# Supplementary material for: Rapid Detection of Fatty Acids in Edible Oils Using Vis-NIR Reflectance Spectroscopy with Multivariate Methods
Source: MDPI journal article supplement (doi:10.3390/bios11080261), 2021-08-03
Supplement: s1 [file s1]

# Supplementary material: Rapid quality detection of edible oils using Vis-NIR reflectance spectroscopy with multivariate methods

Ning Su<sup>1,2</sup>, Fangfang Pan<sup>3</sup>, Liusan Wang<sup>1,2,\*</sup>, and Shizhuang Weng<sup>3,\*</sup>

<sup>1</sup> Institute of Intelligent Machines, Hefei Institutes of Physical Science, Chinese Academy of Sciences, Hefei 230031, China

<sup>2</sup> Intelligent Agriculture Engineering Laboratory of Anhui Province, China, Hefei 230031, China

<sup>3</sup> National Engineering Research Center for Agro-Ecological Big Data Analysis and Application, Anhui University, Hefei 230601, China

\* Correspondence: lswang@iim.ac.cn (L. W.), weng\_1989@126.com (S. W.)

## Measurement of fatty acid contents by GC-MS

The workflow of the quantitative determination for fatty acids in oil samples by GC-MS is shown in Fig. S1. First, the 100 mg of oil sample was dissolved in 2 mL of n-hexane and oscillated by ultrasonic waves for 10 minutes. Then, the solution was added 2 mL of methanol solution (0.5 mol /L) and ultrasonic vibration for 5 minutes to methyl esterification of the oil sample. Third, 2ml hydrochloric acid was added and settled in a warm bath for 3 minutes to neutralize excess potassium hydroxide. At last, the final organic solution at the top level was separated by 0.4  $\mu$ m filter. The processed sample was measured by GCMS-QP2010 SE.

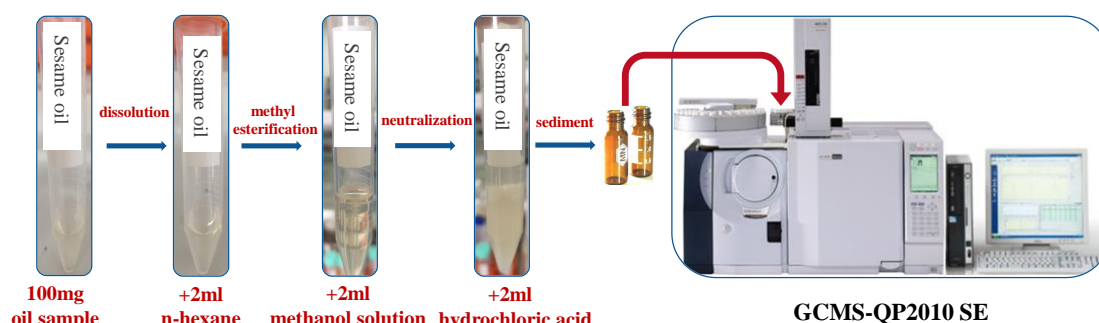

**Figure S1.** The workflow of the quantitative analysis for fatty acids in oil samples by GC-MS.

Five standard samples of fatty acid methyl esters with different concentrations were used to observe the content of four FAMES. The GC-MS was used to collect the ion spectra of the four FAMES mixed standard samples. The deterministic quantitative relationship of the four fatty acids were shown in Table S1.

**Table S1.** Qualitative analysis of four FAMES by GC-MS

| Composition       | Structure | Time (min) | Target (m/z) | Calibration curve | $R^2$  |
|-------------------|-----------|------------|--------------|-------------------|--------|
| Methyl palmitate  | C16:0     | 12.975     | 270.45       | $y = 1447802x$    | 0.9835 |
| Methyl stearate   | C18:0     | 14.683     | 298.50       | $y = 1915373x$    | 0.9999 |
| Methyl arachidate | C20:0     | 16.833     | 326.56       | $y = 1818904x$    | 0.9989 |
| Methyl behenate   | C22:0     | 19.558     | 354.61       | $y = 1818514x$    | 0.9999 |

$x$  is the percentage of fatty acid content and  $y$  is the peak area,  $R^2$  is the coefficient of determination of the model.

Based on the measurement of GC-MS, the representative chromatograms of the four fatty acids in seven kinds of edible oils were shown in Fig. S2. The chromatographic peak 1 corresponds to methyl palmitate. The chromatographic peak 2 corresponds to methyl stearate. The chromatographic peak 3 corresponds to methyl arachidate. The chromatographic peak 4 corresponds to methyl behenate. The complete data of the content of the four fatty acids was provided in Table S2.

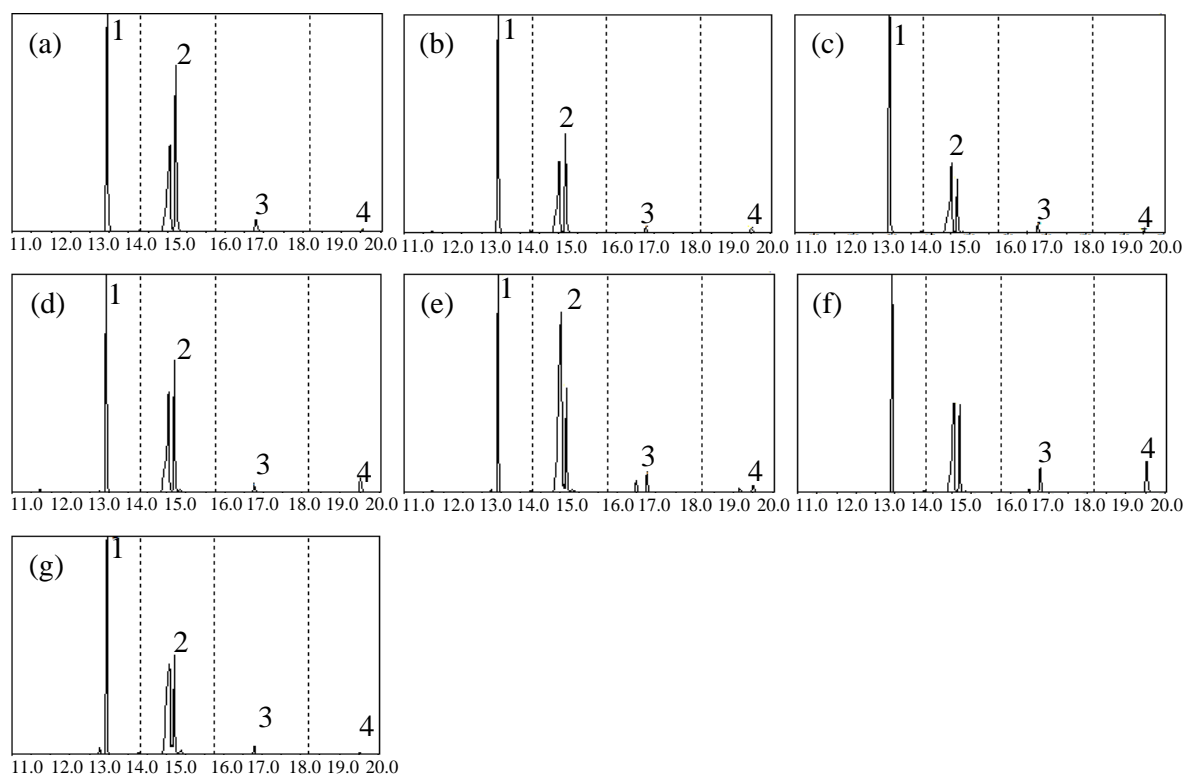

**Figure S2.** The representative chromatograms of four fatty acids composition of sesame oil (a), soybean oil (b), corn oil (c), sunflower oil (d), rapeseed oil (e), peanut oil (f), and olive oil (g).

**Table S2.** The quantitative results of four fatty acids in 93 brands of edible oils by GC-MS (Unit:%)

| Label                             | Palmitic acid | Stearic acid | Arachidic acid | Behenic acid |
|-----------------------------------|---------------|--------------|----------------|--------------|
| Three Tim Sesame Oil              | 11.133        | 6.4327       | 0.7114         | 0.122        |
| Arowana Sesame Oil                | 10.2031       | 5.1494       | 0.5798         | 0.1104       |
| Lee Kum Kee Pure Black Sesame Oil | 10.7171       | 5.5025       | 0.6271         | 0.1174       |
| Totole Sesame Oil                 | 11.6748       | 5.7126       | 0.6716         | 0.1309       |
| Longxi Sesame Oil                 | 12.207        | 6.3237       | 0.7537         | 0.1421       |
| Sharia Sesame Oil                 | 10.6582       | 5.0288       | 0.559          | 0.108        |
| Yanzhuang Sesame Oil              | 11.5204       | 5.9869       | 0.6898         | 0.1304       |
| Luhua Sesame Oil                  | 11.3329       | 5.5537       | 0.6228         | 0.1183       |
| Jiudouwan Sesame Oil              | 13.2082       | 5.5894       | 0.7411         | 0.1815       |
| Xiangmanyuan Sesame Oil           | 13.1675       | 5.9234       | 0.7405         | 0.1774       |
| Changkang Sesame Oil              | 11.4941       | 5.7723       | 0.639          | 0.2166       |
| Cuiyu Sesame Oil                  | 12.9455       | 6.674        | 0.7818         | 0.149        |
| Lee Kum Kee Pure Sesame Oil       | 12.0693       | 6.3515       | 0.7316         | 0.141        |
| Arowana small grinding Sesame Oil | 13.7509       | 5.9319       | 0.7234         | 0.1549       |
| Xingzhenhu Sesame Oil             | 14.0677       | 7.6389       | 0.8711         | 0.1466       |
| Ginger Soybean Oil                | 12.4161       | 4.2558       | 0.3455         | 0.347        |
| Guiqingyuan Soybean Oil           | 13.7001       | 4.7536       | 0.4013         | 0.3988       |
| Arowana Soybean Oil               | 14.34         | 4.8426       | 0.4702         | 0.5239       |
| Laki Soybean Oil                  | 14.3579       | 4.4982       | 0.385          | 0.3902       |
| Shuheyou Soybean Oil              | 14.813        | 4.8688       | 0.4321         | 0.4598       |
| Fuhong Soybean Oil                | 15.0004       | 5.6376       | 0.5685         | 0.5986       |
| Fulinmen Soybean Oil              | 15.4023       | 5.6399       | 0.5348         | 0.5466       |
| Jiusan Soybean Oil                | 15.4915       | 5.631        | 0.4899         | 0.4888       |
| Qishi Soybean Oil                 | 15.6377       | 5.7207       | 0.5023         | 0.4984       |
| Yupinxiang Soybean Oil            | 15.5263       | 5.686        | 0.5467         | 0.6475       |
| Shukeman Soybean Oil              | 16.6229       | 5.9816       | 0.6            | 0.6549       |
| Tianxiawugu Soybean Oil           | 16.3757       | 5.5266       | 0.5834         | 0.6472       |
| Zhongding Soybean Oil             | 16.5944       | 6.1095       | 0.5365         | 0.4295       |
| Yuanbao Soybean Oil               | 16.7999       | 5.5772       | 0.5982         | 0.7016       |
| Jilang Soybean Oil                | 17.5792       | 6.2082       | 0.5434         | 0.5475       |
| West King Corn Oil                | 16.979        | 2.4463       | 0.5384         | 0.1667       |
| Galaxy Corn Oil                   | 16.4881       | 2.5038       | 0.5356         | 0.18         |
| Jinding Corn Oil                  | 16.5418       | 2.3833       | 0.5129         | 0.1387       |
| Daomai Corn Oil                   | 15.979        | 2.7365       | 0.5318         | 0.2292       |
| Haitian Corn Oil                  | 15.7946       | 3.0245       | 0.4969         | 0.343        |
| Meiling Corn Oil                  | 17.6201       | 2.559        | 0.5562         | 0.1478       |
| Fengyuan Corn Oil                 | 16.8488       | 2.5668       | 0.5489         | 0.1771       |
| Kuiwang Corn Oil                  | 15.6626       | 2.8855       | 0.5676         | 0.1817       |
| Arowana Corn Oil                  | 17.7624       | 2.6574       | 0.5712         | 0.1747       |
| Jialebao Corn Oil                 | 16.6837       | 2.6869       | 0.5779         | 0.1678       |
| Fulinmen Corn Oil                 | 17.0643       | 2.491        | 0.5396         | 0.1481       |
| Chucui Sunflower Oil              | 11.2395       | 4.9457       | 0.3672         | 0.9748       |
| Duoli Sunflower Oil               | 11.8228       | 5.1791       | 0.3674         | 1.0596       |
| Fulinmen Sunflower Oil            | 11.0482       | 5.0737       | 0.3517         | 1.0517       |
| Pietro Coricelli Sunflower Oil    | 11.5254       | 5.4915       | 0.3912         | 1.0479       |
| Lizzi Sunflower Oil               | 9.2309        | 3.883        | 0.2605         | 0.7252       |
| Arowana Sunflower Oil             | 11.6866       | 5.4341       | 0.3899         | 1.1208       |
| Abril Sunflower Oil               | 10.7979       | 5.1255       | 0.37           | 0.9907       |

|                                      |         |        |        |        |
|--------------------------------------|---------|--------|--------|--------|
| Haishi Sunflower Oil                 | 10.4238 | 4.8667 | 0.3392 | 0.9504 |
| Jinding Sunflower Oil                | 11.0386 | 5.1692 | 0.3654 | 1.0056 |
| Haitian Sunflower Oil                | 11.5484 | 5.6514 | 0.4002 | 1.0905 |
| Daomai Sunflower Oil                 | 12.5424 | 5.9795 | 0.4374 | 1.2001 |
| Tianfu Rapeseed Oil                  | 4.5982  | 1.6598 | 0.4627 | 0.238  |
| Xiancan Rapeseed Oil                 | 4.3481  | 1.5791 | 0.5527 | 0.2813 |
| Daodaoquan Rapeseed Oil              | 4.9927  | 1.6898 | 0.5287 | 0.2711 |
| Linxiangyuan Rapeseed Oil            | 5.7023  | 1.9365 | 0.4648 | 0.2616 |
| Fulinmen Rapeseed Oil                | 4.2581  | 1.5486 | 0.5343 | 0.2921 |
| Haitian low erucic acid Rapeseed Oil | 5.5169  | 1.9728 | 0.5405 | 0.2872 |
| Fengyuan Rapeseed Oil                | 4.5607  | 1.5541 | 0.4389 | 0.2415 |
| Nissin Rapeseed Oil                  | 4.7172  | 1.651  | 0.4804 | 0.2394 |
| Chuancaiwan Rapeseed Oil             | 4.5418  | 1.4439 | 0.4314 | 0.2373 |
| Haitian Rapeseed Oil                 | 4.3452  | 1.4594 | 0.4267 | 0.2224 |
| Luhua Rapeseed Oil                   | 5.9008  | 1.9958 | 0.494  | 0.2888 |
| Arowana Rapeseed Oil                 | 5.5283  | 1.9798 | 0.6746 | 0.3657 |
| Hongqingting Rapeseed Oil            | 5.0887  | 1.7766 | 0.5462 | 0.2747 |
| Hujihua Peanut Oil                   | 11.4433 | 3.2881 | 1.2854 | 2.0055 |
| Chucui Peanut Oil                    | 13.5995 | 4.168  | 1.6716 | 2.852  |
| Longda Puree Pressed Peanut Oil      | 14.0558 | 4.1993 | 1.6173 | 2.5231 |
| Fulinmen Peanut Oil                  | 10.3489 | 3.3056 | 1.2281 | 2.3765 |
| Longda Squeezed Peanut Oil           | 10.4006 | 2.8187 | 1.0466 | 1.7244 |
| Changshenghua Peanut Oil             | 10.72   | 3.1214 | 1.0786 | 1.8864 |
| Jinsheng Peanut Oil                  | 9.4494  | 2.8623 | 1.078  | 1.9047 |
| First Place Peanut Oil               | 7.6572  | 2.4307 | 0.8053 | 1.5411 |
| Chubao Peanut Oil                    | 12.3571 | 3.5563 | 1.0129 | 1.7283 |
| Xinghe Peanut Oil                    | 12.7657 | 3.5506 | 1.1317 | 1.8719 |
| Luhua Peanut Oil                     | 11.7193 | 3.6458 | 1.4001 | 2.3164 |
| Yuhuang Peanut Oil                   | 11.2435 | 3.1966 | 1.0895 | 1.9271 |
| Golden Valley Farm Peanut Oil        | 9.0187  | 2.5165 | 0.7728 | 1.2197 |
| S1 Peanut Oil                        | 11.4755 | 3.429  | 1.0037 | 1.7095 |
| S2 Peanut Oil                        | 11.4826 | 3.58   | 1.1298 | 2.0657 |
| Luhua Olive Oil                      | 14.588  | 3.9202 | 0.4582 | 0.1614 |
| LaEspanola Olive Oil                 | 10.3014 | 3.4154 | 0.4234 | 0.1121 |
| Gallo Olive Oil                      | 13.2771 | 3.6483 | 0.4169 | 0.1056 |
| Big Ben Olive Oil                    | 14.3439 | 3.2335 | 0.4054 | 0.1024 |
| Olivier Olive Oil                    | 15.7767 | 2.9086 | 0.4255 | 0.1234 |
| Chudao Olive Oil                     | 13.7346 | 3.2852 | 0.4141 | 0.1274 |
| Albury Olive Oil                     | 11.8003 | 3.5065 | 0.4122 | 0.1092 |
| Muxi Manor Olive Oil                 | 14.6688 | 2.922  | 0.4067 | 0.1071 |
| Philippe Barry Olive Oil             | 14.9531 | 3.3215 | 0.4455 | 0.115  |
| Bellina Olive Oil                    | 15.4441 | 2.968  | 0.4407 | 0.121  |
| Abaco Olive Oil                      | 15.1407 | 2.8574 | 0.4228 | 0.1153 |
| X1 Olive Oil                         | 12.6099 | 3.6437 | 0.3899 | 0.0926 |
| X2 Olive Oil                         | 13.1325 | 3.2539 | 0.4005 | 0.1049 |

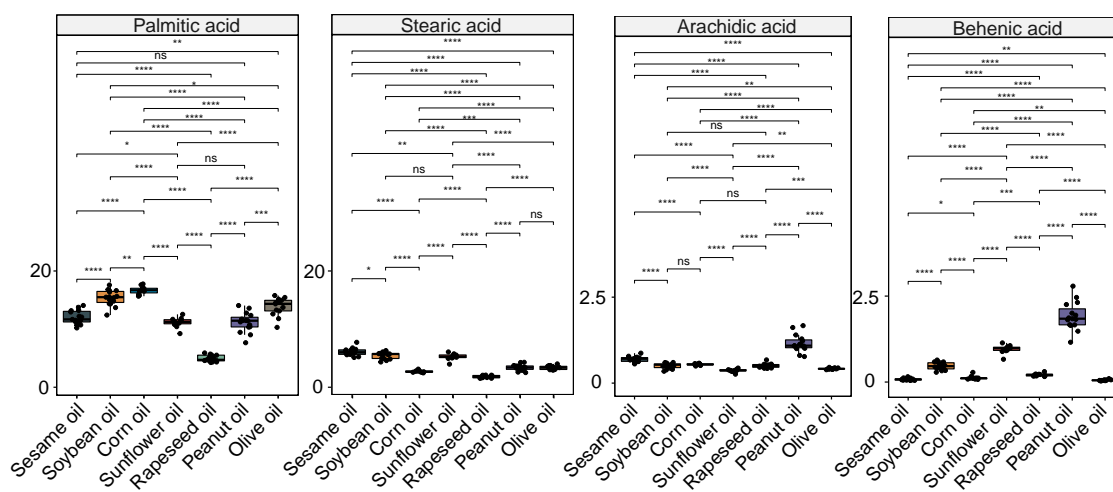

**Figure S3.** The statistical tests of four fatty acids in different edible oils. (ns represents  $P > 0.05$ , \* represents  $p \leq 0.05$ , \*\* represents  $p \leq 0.01$ , \*\*\* represents  $p \leq 0.001$ , \*\*\*\* represents  $p \leq 0.0001$ . The Wilcoxon test was used for the statistical test.)

**Table S3.** Prediction results of four fatty acids in edible oils obtained using full wavelengths

|                | Model | Pretreatment | Calibration set |          | Prediction set |          |
|----------------|-------|--------------|-----------------|----------|----------------|----------|
|                |       |              | $R_C^2$         | $RMSE_C$ | $R_P^2$        | $RMSE_P$ |
| Palmitic acid  | PLSR  | RAW          | 0.8365          | 0.9336   | 1.6649         | 0.8709   |
|                |       | SNV          | 0.7583          | 0.9402   | 1.5326         | 0.8807   |
|                |       | MSC          | 0.7579          | 0.9403   | 1.6297         | 0.8733   |
|                |       | SG smoothing | 1.0946          | 0.9109   | 1.7507         | 0.8592   |
|                |       | WT           | 0.8849          | 0.9294   | 1.6768         | 0.8695   |
|                | SVM   | RAW          | 0.6989          | 0.9645   | 1.1008         | 0.9117   |
|                |       | SNV          | 0.2562          | 0.9952   | 0.8181         | 0.9504   |
|                |       | MSC          | 0.195           | 0.9972   | 0.8136         | 0.951    |
|                |       | SG smoothing | 0.7567          | 0.9582   | 1.12           | 0.9085   |
|                |       | WT           | 0.7105          | 0.9632   | 1.104          | 0.9111   |
|                | RF    | RAW          | 0.5979          | 0.9662   | 1.3525         | 0.7893   |
|                |       | SNV          | 0.4215          | 0.9833   | 1.0355         | 0.8552   |
|                |       | MSC          | 0.4288          | 0.9828   | 1.0418         | 0.8572   |
|                |       | SG smoothing | 0.599           | 0.9664   | 1.3786         | 0.7836   |
|                |       | WT           | 0.6096          | 0.9647   | 1.3762         | 0.7855   |
| Stearic acid   | PLSR  | RAW          | 0.4614          | 0.9118   | 0.5989         | 0.8538   |
|                |       | SNV          | 0.4233          | 0.9257   | 0.5845         | 0.8607   |
|                |       | MSC          | 0.4232          | 0.9258   | 0.5968         | 0.8553   |
|                |       | SG smoothing | 0.5249          | 0.8858   | 0.602          | 0.8509   |
|                |       | WT           | 0.4743          | 0.9067   | 0.5982         | 0.8538   |
|                | SVM   | RAW          | 0.0631          | 0.9984   | 0.4328         | 0.9224   |
|                |       | SNV          | 0.0404          | 0.9993   | 0.2965         | 0.9636   |
|                |       | MSC          | 0.1035          | 0.9956   | 0.3016         | 0.9624   |
|                |       | SG smoothing | 0.0839          | 0.9971   | 0.4278         | 0.9242   |
|                |       | WT           | 0.067           | 0.9982   | 0.4312         | 0.9229   |
|                | RF    | RAW          | 0.2459          | 0.9687   | 0.5845         | 0.7854   |
|                |       | SNV          | 0.1735          | 0.9857   | 0.3954         | 0.9126   |
|                |       | MSC          | 0.1676          | 0.9866   | 0.3847         | 0.9168   |
|                |       | SG smoothing | 0.2529          | 0.9674   | 0.6051         | 0.7727   |
|                |       | WT           | 0.2525          | 0.9673   | 0.5957         | 0.7782   |
| Arachidic acid | PLSR  | RAW          | 0.0927          | 0.8897   | 0.1219         | 0.8152   |
|                |       | SNV          | 0.0879          | 0.9008   | 0.1203         | 0.8186   |
|                |       | MSC          | 0.0874          | 0.9019   | 0.1221         | 0.8145   |
|                |       | SG smoothing | 0.106           | 0.8557   | 0.1178         | 0.8261   |
|                |       | WT           | 0.0952          | 0.8838   | 0.1211         | 0.8174   |
|                | SVM   | RAW          | 0.0762          | 0.9313   | 0.096          | 0.8848   |
|                |       | SNV          | 0.0204          | 0.9948   | 0.0577         | 0.9576   |
|                |       | MSC          | 0.0276          | 0.9907   | 0.0615         | 0.9526   |
|                |       | SG smoothing | 0.0806          | 0.9245   | 0.0942         | 0.8905   |
|                |       | WT           | 0.077           | 0.93     | 0.0955         | 0.8864   |
|                | RF    | RAW          | 0.0487          | 0.9587   | 0.0902         | 0.8161   |
|                |       | SNV          | 0.0317          | 0.9839   | 0.0548         | 0.9414   |
|                |       | MSC          | 0.0317          | 0.9843   | 0.0562         | 0.9421   |
|                |       | SG smoothing | 0.0489          | 0.9592   | 0.0959         | 0.8029   |
|                |       | WT           | 0.0505          | 0.9554   | 0.0922         | 0.8123   |
| Behenic acid   | PLSR  | RAW          | 0.1879          | 0.923    | 0.2517         | 0.8666   |
|                |       | SNV          | 0.176           | 0.9324   | 0.2485         | 0.8699   |
|                |       | MSC          | 0.1764          | 0.9321   | 0.2511         | 0.8678   |
|                |       | SG smoothing | 0.214           | 0.9      | 0.2459         | 0.8701   |
|                |       | WT           | 0.1934          | 0.9184   | 0.2498         | 0.8679   |
|                | SVM   | RAW          | 0.1229          | 0.969    | 0.208          | 0.9065   |
|                |       | SNV          | 0.0187          | 0.9992   | 0.1486         | 0.9521   |
|                |       | MSC          | 0.0184          | 0.9993   | 0.1543         | 0.9485   |
|                |       | SG smoothing | 0.1334          | 0.9634   | 0.2091         | 0.9051   |
|                |       | WT           | 0.1244          | 0.9682   | 0.2078         | 0.9067   |
|                | RF    | RAW          | 0.1026          | 0.9722   | 0.2312         | 0.8261   |
|                |       | SNV          | 0.0622          | 0.9905   | 0.1359         | 0.9486   |
|                |       | MSC          | 0.0589          | 0.9915   | 0.1347         | 0.9496   |
|                |       | SG smoothing | 0.1012          | 0.9731   | 0.2348         | 0.8221   |
|                |       | WT           | 0.1038          | 0.9713   | 0.2293         | 0.8273   |

**Table S4.** Parameter setting of multivariate analysis methods using the full wavelengths

| Fatty acids    | Model | Pretreatment | Setting of parameters            |
|----------------|-------|--------------|----------------------------------|
| Palmitic acid  | PLSR  | SNV          | nLVs =13                         |
|                |       | MSC          | nLVs =14                         |
|                | SVM   | SNV          | linear kernel, c =0.6, p = 0.01  |
|                |       | MSC          | linear kernel, c = 4, p = 0.001  |
|                | RF    | SNV          | mtree=190, mtry= 53              |
|                |       | MSC          | mtree=200, mtry= 50              |
| Stearic acid   | PLSR  | SNV          | nLVs =15                         |
|                |       | MSC          | nLVs =13                         |
|                | SVM   | SNV          | linear kernel, c = 4, p = 0.01   |
|                |       | MSC          | linear kernel, c = 5, p = 0.001  |
|                | RF    | SNV          | mtree=180, mtry= 58              |
|                |       | MSC          | mtree=190, mtry= 52              |
| Arachidic acid | PLSR  | SNV          | nLVs =14                         |
|                |       | WT           | nLVs =13                         |
|                | SVM   | SNV          | linear kernel, c = 2, p = 0.001  |
|                |       | MSC          | linear kernel, c = 0.5, p = 0.05 |
|                | RF    | SNV          | mtree=200, mtry= 44              |
|                |       | MSC          | mtree=205, mtry= 48              |
| Behenic acid   | PLSR  | SNV          | nLVs =16                         |
|                |       | SG smoothing | nLVs =12                         |
|                | SVM   | SNV          | linear kernel, c = 1, p = 0.001  |
|                |       | MSC          | linear kernel, c = 2, p = 0.001  |
|                | RF    | SNV          | mtree=195, mtry= 45              |
|                |       | MSC          | mtree=200, mtry= 40              |

PLSR: nLVs - Number of PLS components. SVM: c - Penalty parameter C of the error term; p - Values of loss function in SVM. RF: ntree - Number of trees grown; mtry - Number of predictors sampled for splitting at each node.

**Table S5.** Parameter setting of multivariate analysis methods using the effective wavelengths

| Fatty acids    | Model       | Setting of parameters                  |
|----------------|-------------|----------------------------------------|
| Palmitic acid  | SNV+SPA+SVM | linear kernel, $c = 10$ , $p = 0.001$  |
|                | SNV+VIP+SVM | linear kernel, $c = 7$ , $p = 0.09$    |
|                | SNV+PCA+SVM | linear kernel, $c = 12$ , $p = 0.05$   |
| Stearic acid   | SNV+SPA+SVM | linear kernel, $c = 12$ , $p = 0.0001$ |
|                | SNV+VIP+SVM | linear kernel, $c = 10$ , $p = 0.01$   |
|                | SNV+PCA+SVM | linear kernel, $c = 15$ , $p = 0.0001$ |
| Arachidic acid | SNV+SPA+SVM | linear kernel, $c = 10$ , $p = 0.001$  |
|                | SNV+VIP+SVM | linear kernel, $c = 10$ , $p = 0.01$   |
|                | SNV+PCA+RF  | mtree= 100, mtry= 3                    |
| Behenic acid   | SNV+SPA+RF  | mtree= 100, mtry= 4                    |
|                | SNV+VIP+SVM | linear kernel, $c = 5$ , $p = 0.01$    |
|                | SNV+PCA+RF  | mtree= 100, mtry=2                     |

SVM:  $c$  - Penalty parameter  $C$  of the error term;  $p$  - Values of loss function in SVM. RF: ntree - Number of trees grown; mtry - Number of predictors sampled for splitting at each node.
